# Supplementary material for: Chiral cyclic architectonics with tetraphenylethylenes: conformation immobilization, optical resolution and circularly polarized luminescence
Source: Royal Society of Chemistry journal article supplement (doi:10.1039/d2cc04139a), 2022-01-01
Supplement: d2cc04139a1.pdf [file d2cc04139a1.pdf]

Chiral cyclic architectonics with tetraphenylethylenes:  
conformation immobilization, optical resolution and circularly  
polarized luminescence

Qi Meng, Liwen Cui, Qi Liao, Jian Xu\* and Yuxiang Wang\*

Jiangsu Province Key Laboratory of Fine Petrochemical Engineering, School of  
Petrochemical Engineering, Changzhou University, Changzhou 213164, China. E-  
mail: wangyx@cczu.edu.cn

# Table of Contents

1. Measurements and Materials
2. Synthesis procedures of the chiral cyclic TPEs
3. Photophysical Properties of the chiral cyclic TPEs
4. Chiroptical properties of the chiral cyclic TPEs
5. Crystal data and structure refinement for the chiral cyclic TPEs
6. Chiral HPLC analysis of the chiral cyclic TPEs
7. NMR Spectra of the chiral cyclic TPEs
8. HRMS Spectra of the chiral cyclic TPEs
9. Theoretical calculations of chiral cyclic TPEs

## 1. Measurements and Materials

Nuclear magnetic resonance (NMR) spectra were recorded on 300 MHz Bruker spectrometer with TMS as the internal standard. Ultraviolet-visible (UV-*vis*) spectra were recorded on Shimadzu UV-1700 UV-*vis* spectrophotometer. Emission spectra were performed on Agilent Cary Eclipse spectrophotometer. The transient photoluminescence (PL) decay spectra and absolute PL quantum yield were determined by Edinburgh FS5 Fluorescence Spectrometer. Circular dichroism (CD) spectra were measured from a JASCO J-810 spectropolarimeter. CPL spectra were measured from a JASCO CPL-300 spectrofluoropolarimeter. The enantiomeric excesses were confirmed by chiral HPLC using an Agilent 1200 LC instrument with a Daicel CHIRALPAK® AD and OD column (solvent flow rate 1.0 L/min).

The single crystals of (*R*)-*p*TPE and (*R*)-*o*TPE1 were obtained by volatilizing the solution of CH<sub>2</sub>Cl<sub>2</sub>/CH<sub>3</sub>OH at room temperature, the single crystals of *rac*-*o*TPE2 and (*S*)-*o*TPE3 were obtained by volatilizing the solution of *i*-PrOH at room temperature. X-ray data at 150 K and 170 K were examined on a Bruker SMART APEX II Single-Crystal X-Ray Diffractometer using MoK $\alpha$  radiation ( $\lambda = 0.71073 \text{ \AA}$ ). The structures were solved by direct methods and refined with the full-matrix least square technique. The details of crystal data and structure refinement were presented in Table S6. The crystal data of (*R*)-*p*TPE, (*R*)-*o*TPE1, *rac*-*o*TPE2 and (*S*)-*o*TPE3 were deposited to CCDC with CCDC number of 2182870, 2182873, 2182878 and 2182879.

## 2. Synthesis procedures of the chiral cyclic TPEs

**Synthesis of (*R*)-*p*TPE.** Compound **1** (100.00 mg, 0.19 mmol) and (*R*)-BINOL (55.24 mg, 0.19 mmol) were dissolved in anhydrous dimethylformamide (DMF, 10 mL), which was slowly added dropwise to anhydrous DMF solution (20 mL) containing anhydrous potassium carbonate (106.66 mg, 0.77 mmol) under N<sub>2</sub> atmosphere at 80 °C. After stirring for 12 h, the mixture was cooled to room temperature, the reaction mixture was washed with water and extracted with ethyl acetate. The organic phase was dried with anhydrous Na<sub>2</sub>SO<sub>4</sub> and the solvent was evaporated. The reaction mixture was purified by column chromatography (petroleum ether/ethyl acetate = 80:1) to afford the (*R*)-*p*TPE (35.20 mg, 28%) as a white powder. <sup>1</sup>H NMR (300 MHz, CDCl<sub>3</sub>):  $\delta$  7.97 (d, *J* = 9.0 Hz, 2H), 7.88 (d, *J* = 8.0 Hz, 2H), 7.58 (d, *J* = 9.1 Hz, 2H), 7.33 (t, *J* = 6.8 Hz, 2H), 7.22 (d, *J* = 6.7 Hz, 2H), 7.16 (d, *J* = 8.2 Hz, 12H), 6.63 (s, 8H), 5.04 (d, *J* = 11.8 Hz, 2H), 4.75 (d, *J* = 11.8 Hz, 2H). <sup>13</sup>C NMR (75 MHz, CDCl<sub>3</sub>):  $\delta$  153.87, 144.18, 141.92, 141.68, 135.39, 134.72, 131.19, 129.28,

128.95, 128.18, 127.95, 126.95, 126.35, 125.73, 123.66, 120.82, 116.12, 70.36. HRMS (ESI, m/z): calcd for C<sub>48</sub>H<sub>35</sub>O<sub>2</sub> [M + H<sup>+</sup>], 643.2632; found, 643.2634.

**Synthesis of (S)-pTPE.** Compound **1** (200.00 mg, 0.31 mmol) and (S)-BINOL (110.49 mg, 0.39 mmol) were dissolved in anhydrous dimethylformamide (DMF, 10 mL), which was slowly added dropwise into 25 mL anhydrous DMF solution containing anhydrous potassium carbonate (213.32 mg, 1.54 mmol) under N<sub>2</sub> atmosphere at 80 °C. After stirring for 12 h, the mixture was cooled to room temperature, the reaction mixture was washed with water and extracted with ethyl acetate. The organic phase was dried with anhydrous Na<sub>2</sub>SO<sub>4</sub> and the solvent was evaporated. The reaction mixture was purified by column chromatography (petroleum ether/ethyl acetate = 80:1) to afford (S)-pTPE (65.00 mg, 26%) as a white powder.

**Synthesis of 2.** In a two-necked round bottom flask were placed 1,1-Di(2-methylphenyl)-2,2-diphenylethylene (1.40 g, 4.13 mmol), N-bromosuccinimide (1.59 g, 8.93 mmol) and a catalytic amount of benzoyl peroxide, then 35 mL of carbon tetrachloride was added. The mixture was refluxed for 5 h. After cooling to room temperature, the reaction mixture was poured into 80 mL water and extracted with ethyl acetate. The organic layer was dried over anhydrous Na<sub>2</sub>SO<sub>4</sub> and the solvent was evaporated. Then the residue was purified by column chromatography (petroleum ether) to afford product **2** (1.29 g, 64%) as a pale-yellow oil. <sup>1</sup>H NMR (300 MHz, CDCl<sub>3</sub>): δ 7.37-7.30 (m, 2H), 7.22-7.06 (m, 16H), 4.45 (dd, J<sub>1</sub> = 10.4 Hz, J<sub>2</sub> = 10.4 Hz, 2H), 4.14 (dd, J<sub>1</sub> = 10.4 Hz, J<sub>2</sub> = 10.4 Hz, 2H). <sup>13</sup>C NMR (75 MHz, CDCl<sub>3</sub>): δ 142.47, 142.11, 141.93, 140.31, 140.25, 136.42, 135.74, 132.91, 132.59, 131.81, 131.44, 131.26, 131.00, 130.58, 130.43, 128.62, 128.33, 128.23, 128.14, 128.09, 128.03, 127.89, 127.14, 127.04, 32.48, 32.24.

**Synthesis of (R)-oTPE1 to (R)-oTPE3.** Under N<sub>2</sub> atmosphere at 80 °C, 16 mL anhydrous DMF solution containing compound **2** (600.00 mg, 1.16 mmol) was slowly added dropwise into 40 mL anhydrous DMF solution containing (R)-BINOL (331.47 mg, 1.16 mmol) and anhydrous potassium carbonate (639.97 mg, 4.63 mmol). After stirring overnight, the mixture was cooled to room temperature. Then the reaction mixture was washed with water and extracted with ethyl acetate. The organic phase was dried with anhydrous Na<sub>2</sub>SO<sub>4</sub> and solvent was evaporated. The reaction mixture was purified by column chromatography (petroleum ether/ethyl acetate = 100:1) to afford three products all as a white powder.

(R)-oTPE1 (74.80 mg, 10%). <sup>1</sup>H NMR (300 MHz, CDCl<sub>3</sub>): δ 7.81 (d, J = 8.0 Hz, 2H), 7.73 (d, J =

9.1 Hz, 2H), 7.28-7.23 (m, 4H), 7.13-7.10 (m, 2H), 7.07 (d, J = 1.1 Hz, 2H), 7.04 (d, J = 4.3 Hz, 1H), 7.02 (t, J = 2.4 Hz, 1H), 7.00 (t, J = 1.4 Hz, 1H), 6.98-6.95 (m, 4H), 6.78 (d, J = 8.6 Hz, 6H), 6.71 (t, J = 10.0 Hz, 5H), 4.58(d, J = 10.3 Hz, 2H), 4.32(d, J = 10.2 Hz, 2H). <sup>13</sup>C NMR (75 MHz, CDCl<sub>3</sub>): δ 154.51, 142.67, 140.73, 140.24, 135.73, 134.77, 133.70, 131.20, 130.47, 128.91, 128.40, 127.80, 127.72, 127.60, 126.58, 126.14, 126.00, 125.49, 123.03, 118.46, 113.84, 69.20. HRMS (ESI, m/z): calcd for C<sub>48</sub>H<sub>34</sub>O<sub>2</sub>Na [M + Na<sup>+</sup>], 665.2451; found, 665.2454.

**(R)-oTPE2** (59.70 mg, 8%). <sup>1</sup>H NMR (300 MHz, CDCl<sub>3</sub>): δ 7.92 (d, J = 9.1 Hz, 2H), 7.87 (d, J = 8.1 Hz, 2H), 7.53 (d, J = 9.1 Hz, 2H), 7.45 (d, J = 7.5 Hz, 2H), 7.30 (d, J = 6.7 Hz, 2H), 7.23-7.16 (m, 3H), 7.12 (d, J = 9.1 Hz, 2H), 7.08-6.95 (m, 5H), 6.80 (t, J = 7.3 Hz, 2H), 6.61 (t, J = 7.3 Hz, 4H), 6.47 (d, J = 7.4 Hz, 4H), 4.69 (d, J = 14.2 Hz, 2H), 4.20 (d, J = 14.1 Hz, 2H). <sup>13</sup>C NMR (75 MHz, CDCl<sub>3</sub>): δ 155.05, 142.48, 140.63, 140.47, 138.22, 134.34, 134.01, 131.14, 129.36, 128.98, 128.80, 127.85, 127.43, 126.84, 126.21, 125.94, 125.30, 123.26, 119.76, 115.18, 70.53. HRMS (ESI, m/z): calcd for C<sub>48</sub>H<sub>34</sub>O<sub>2</sub>K [M + K<sup>+</sup>], 681.2190; found, 681.2182.

**(R)-oTPE3** (55.00 mg, 7%). <sup>1</sup>H NMR (300 MHz, CDCl<sub>3</sub>): δ 7.84 (q, J = 8.6 Hz, 4H), 7.61 (d, J = 7.3 Hz, 1H), 7.49 (d, J = 9.1 Hz, 1H), 7.37-7.30 (m, 3H), 7.24 (d, J = 6.9 Hz, 1H), 7.19 (q, J = 1.7 Hz, 1H), 7.17-7.15 (m, 2H), 7.12-7.07 (m, 7H), 7.03-7.00 (m, 2H), 6.99-6.89 (m, 3H), 6.79 (d, J = 7.5 Hz, 1 H), 6.70 (t, J = 7.9 Hz, 2H), 6.46 (d, J = 7.1 Hz, 2H), 5.17 (d, J = 10.7 Hz, 1H), 4.73 (d, J = 14.5 Hz, 1H), 4.25 (d, J = 14.5 Hz, 1H), 3.93 (d, J = 10.7 Hz, 1H). <sup>13</sup>C NMR (75 MHz, CDCl<sub>3</sub>): δ 156.35, 154.69, 143.57, 143.39, 142.10, 141.10, 140.34, 139.89, 136.07, 135.27, 134.60, 134.37, 134.24, 132.89, 132.08, 131.18, 130.88, 129.81, 129.59, 129.38, 129.15, 127.95, 127.89, 127.73, 127.59, 127.34, 127.11, 127.06, 126.73, 126.63, 126.45, 125.36, 125.30, 124.17, 123.97, 122.53, 120.45, 119.40, 117.59, 72.00, 69.92. HRMS (ESI, m/z): calcd for C<sub>48</sub>H<sub>34</sub>O<sub>2</sub>Na [M + Na<sup>+</sup>], 665.2451; found, 665.2441.

**Synthesis of (S)-oTPE.** Under N<sub>2</sub> atmosphere at 80 °C, 40 mL anhydrous DMF solution containing compound **2** (1.00 g, 1.93 mmol) was slowly added dropwise into 100 mL anhydrous DMF solution containing (S)-BINOL (552.45 mg, 1.93 mmol) and anhydrous potassium carbonate (1.07 mg, 7.74 mmol). After stirring overnight, the mixture was cooled to room temperature. Then the reaction mixture was washed with water and extracted with ethyl acetate. The organic phase was dried with anhydrous Na<sub>2</sub>SO<sub>4</sub> and solvent was evaporated. The reaction mixture was purified by column chromatography (petroleum ether/ethyl acetate = 100:1) to afford three products all as a white

powder. (*S*)-*o*TPE1 (179.00 mg, 14%), (*S*)-*o*TPE2 (98.00 mg, 8%) and (*S*)-*o*TPE3 (51.00 mg, 4%).

### 3. Photophysical Properties of the chiral cyclic TPEs

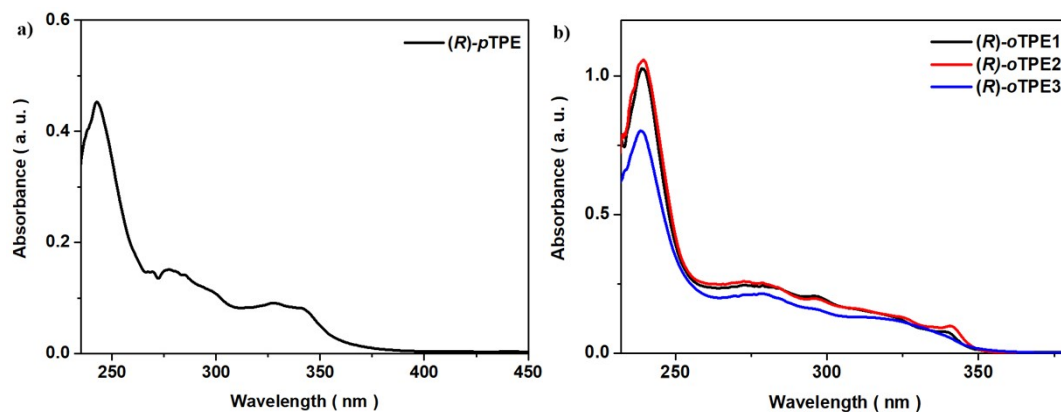

Figure S1. UV spectra of (*R*)-*p*TPE and (*R*)-*o*TPE1 to (*R*)-*o*TPE3 in THF solution (*ca.*  $10^{-5}$  M).

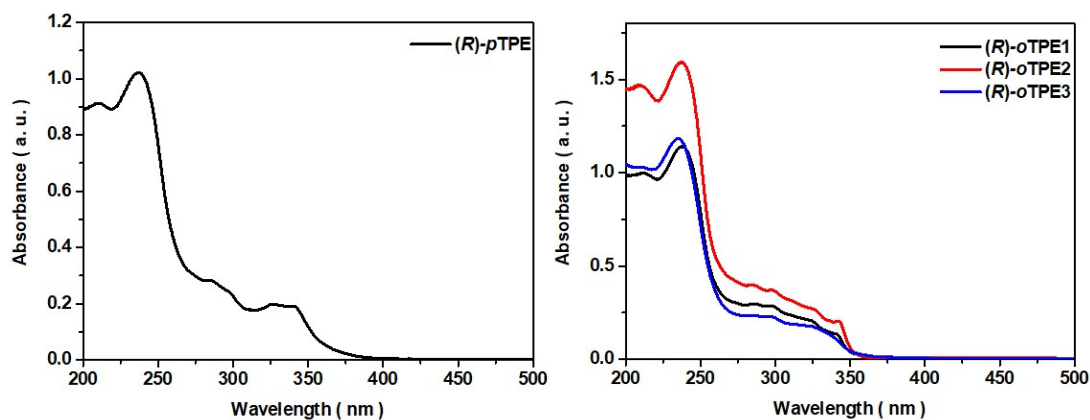

Figure S2. UV spectra of (*R*)-*p*TPE and (*R*)-*o*TPE1 to (*R*)-*o*TPE3 in the film state.

Table S1. Photophysical properties of the chiral cyclic TPEs.

| Compound                       | THF solution                |                            |             |                       | Film                        |                            |             |                       |
|--------------------------------|-----------------------------|----------------------------|-------------|-----------------------|-----------------------------|----------------------------|-------------|-----------------------|
|                                | $\lambda_{\text{abs}}$ (nm) | $\lambda_{\text{em}}$ (nm) | $\tau$ (ns) | $\Phi_{\text{F}}$ (%) | $\lambda_{\text{abs}}$ (nm) | $\lambda_{\text{em}}$ (nm) | $\tau$ (ns) | $\Phi_{\text{F}}$ (%) |
| <b>(<i>R</i>)-<i>p</i>TPE</b>  | 242, 278                    | 497                        | 1.96        | 1.5                   | 238, 285                    | 476                        | 5.31        | 32.6                  |
|                                | 340                         |                            |             |                       | 340                         |                            |             |                       |
| <b>(<i>R</i>)-<i>o</i>TPE1</b> | 239, 273                    | 417                        | 3.89        | 22.4                  | 238, 287                    | 414                        | 1.49        | 23.4                  |
|                                | 339                         |                            |             |                       | 340                         |                            |             |                       |
| <b>(<i>R</i>)-<i>o</i>TPE2</b> | 239, 273                    | 405                        | 4.38        | 15.5                  | 237, 287                    | 402                        | 1.44        | 33.4                  |
|                                | 341                         |                            |             |                       | 342                         |                            |             |                       |
| <b>(<i>R</i>)-<i>o</i>TPE3</b> | 239, 278                    | 405                        | 4.50        | 0.2                   | 235, 294                    | 452                        | 3.68        | 21.0                  |
|                                | 312                         |                            |             |                       | 324                         |                            |             |                       |

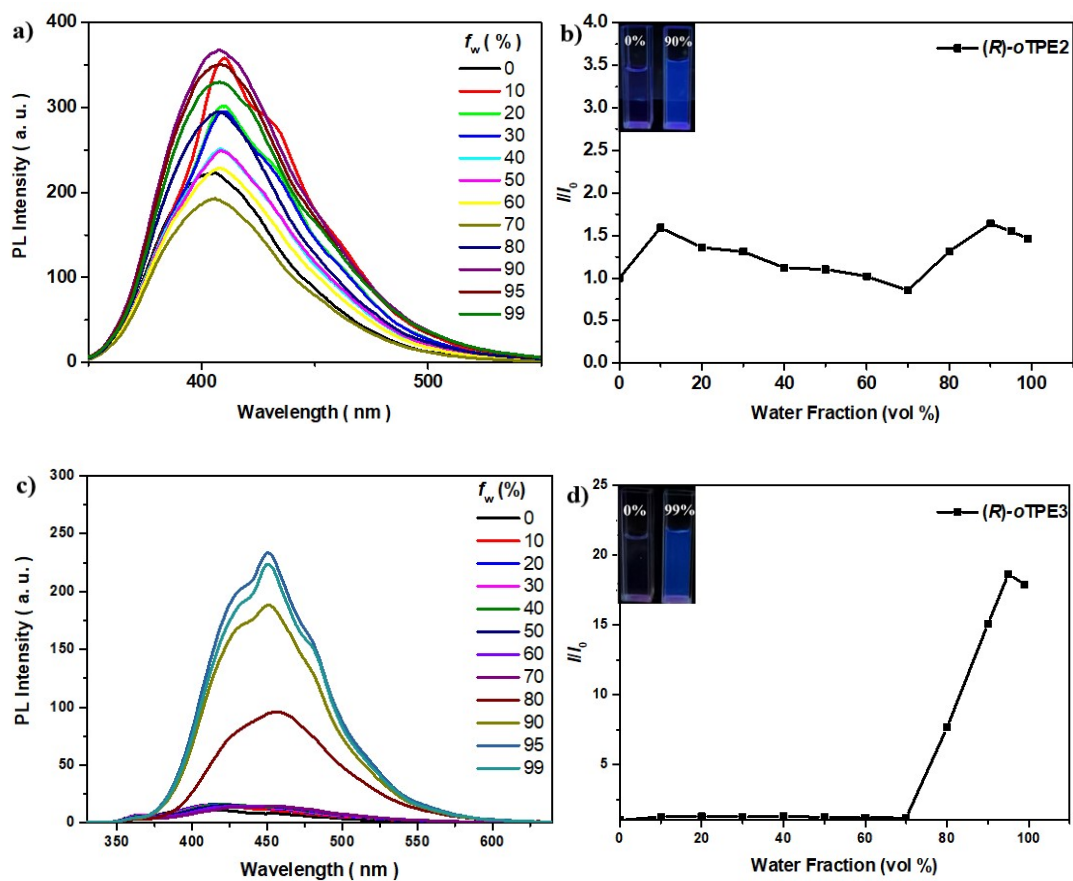

**Figure S3.** (a, c) Fluorescence spectra of *(R)*-oTPE2 and *(R)*-oTPE3 in H<sub>2</sub>O/THF mixtures with different water fraction ( $f_w$  / %). (b, d) the relative fluorescence intensity to  $f_w$ , inset: photographs taken under UV illumination (365 nm).

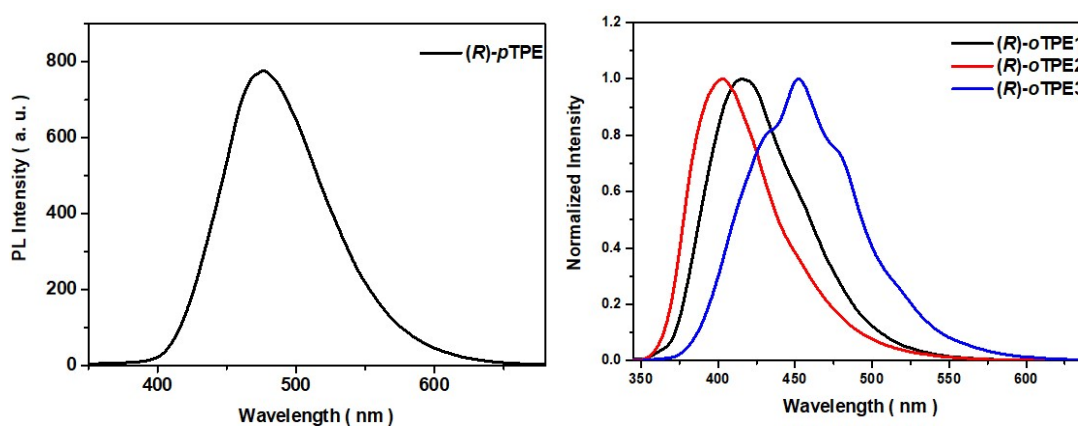

**Figure S4.** Fluorescence spectra of *(R)*-pTPE and *(R)*-oTPE1 to *(R)*-oTPE3 in the film state.

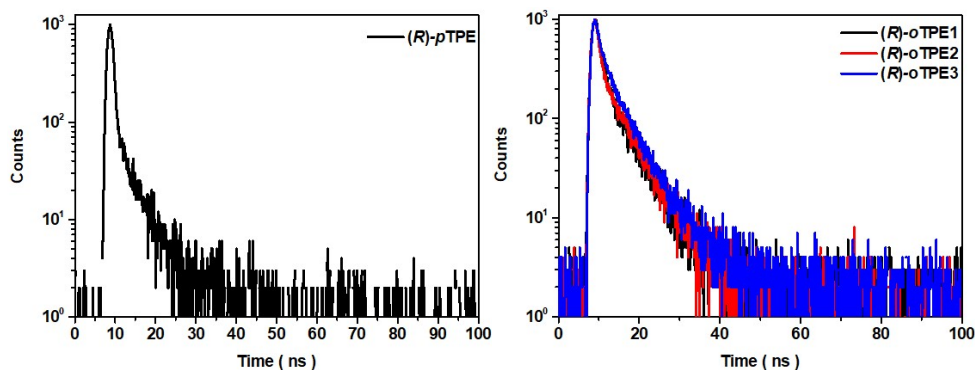

**Figure S5.** Transient PL decay spectra of *(R)*-*p*TPE and *(R)*-*o*TPE1 to *(R)*-*o*TPE3 in THF solution (*ca.*  $10^{-5}$  M).

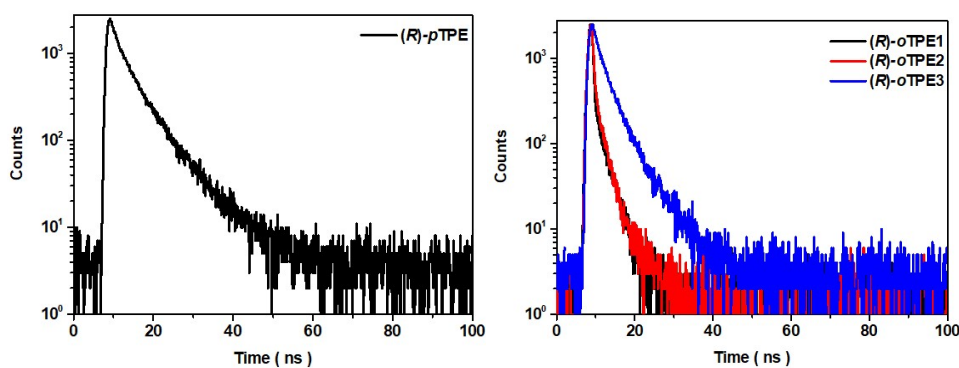

**Figure S6.** Transient PL decay spectra of *(R)*-*p*TPE and *(R)*-*o*TPE1 to *(R)*-*o*TPE3 in the film state.

**Table S2.** Transient PL decay data of the chiral cyclic TPEs in THF solutions and films.<sup>a</sup>

| Compound                   | State        | $\langle\tau\rangle$ [ns] | $\tau_1$ [ns] | $\tau_2$ [ns] | $A_1$  | $A_2$ |
|----------------------------|--------------|---------------------------|---------------|---------------|--------|-------|
| <i>(R)</i> - <i>p</i> TPE  | THF solution | 2.0                       | 0.6           | 4.7           | 1166.4 | 75.9  |
|                            | film         | 5.3                       | 2.3           | 6.8           | 1476.2 | 979.2 |
| <i>(R)</i> - <i>o</i> TPE1 | THF solution | 3.9                       | 1.3           | 5.7           | 790.8  | 265.3 |
|                            | film         | 1.5                       | 0.3           | 2.7           | 2477.9 | 279.7 |
| <i>(R)</i> - <i>o</i> TPE2 | THF solution | 4.4                       | 1.0           | 5.8           | 772.7  | 3113. |
|                            | film         | 1.4                       | 0.4           | 2.4           | 2155.3 | 425.6 |
| <i>(R)</i> - <i>o</i> TPE3 | THF solution | 4.5                       | 1.5           | 5.7           | 642.3  | 438.1 |
|                            | film         | 3.7                       | 1.8           | 4.8           | 1498.5 | 909.7 |

<sup>a</sup>Fluorescence lifetimes data were fitted by multiple-exponential function and the mean fluorescence



lifetimes ( $\langle\tau\rangle$ ) were calculated by  $= \Sigma A_i \tau_i^2 / \Sigma A_i \tau_i$ , where  $A_i$  is the preexponential factors for  $\tau_i$ .

#### 4. Chiroptical properties of the chiral cyclic TPEs

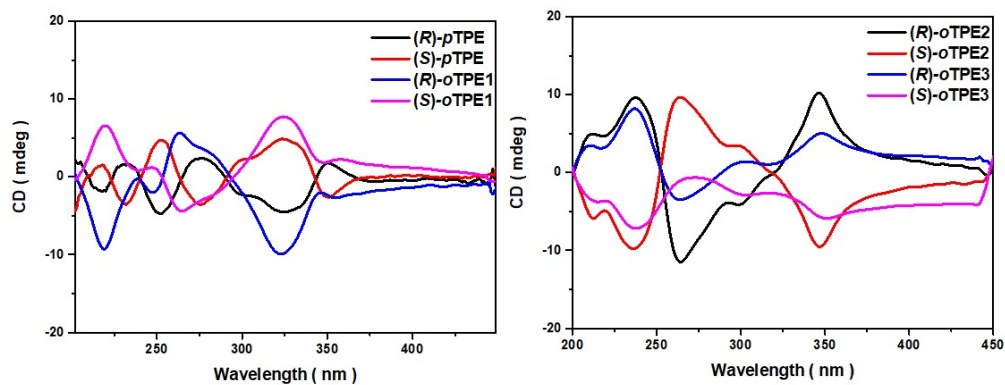

Figure S7. CD spectra of (*R/S*)-*p*TPE and (*R/S*)-*o*TPE1 to (*R/S*)-*o*TPE3 in 99:1 H<sub>2</sub>O/THF.

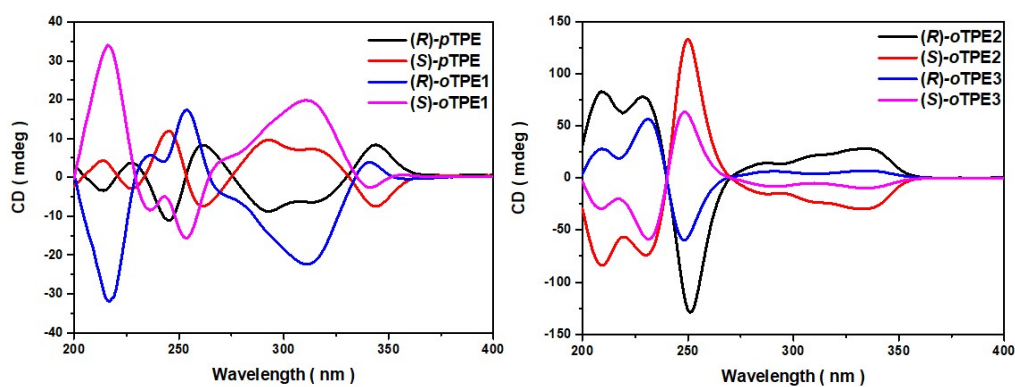

Figure S8. CD spectra of (*R/S*)-*p*TPE and (*R/S*)-*o*TPE1 to (*R/S*)-*o*TPE3 in the film state.

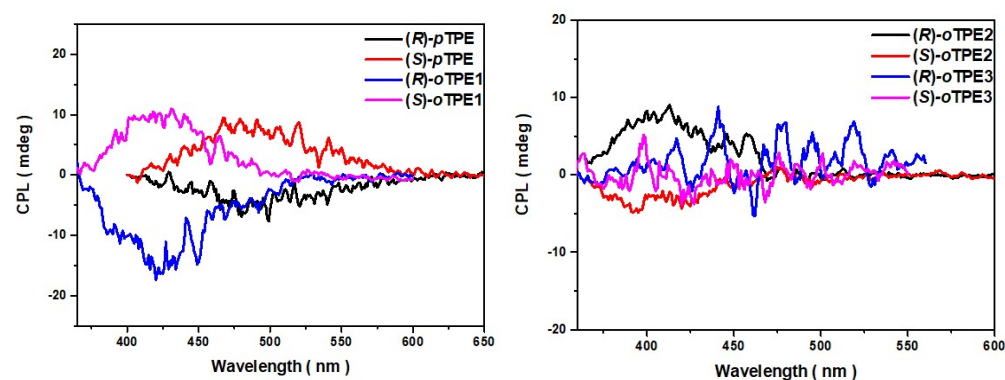

Figure S9. CPL spectra of the (*R/S*)-*p*TPE and (*R/S*)-*o*TPE1 to (*R/S*)-*o*TPE3 in 99:1 H<sub>2</sub>O/THF.

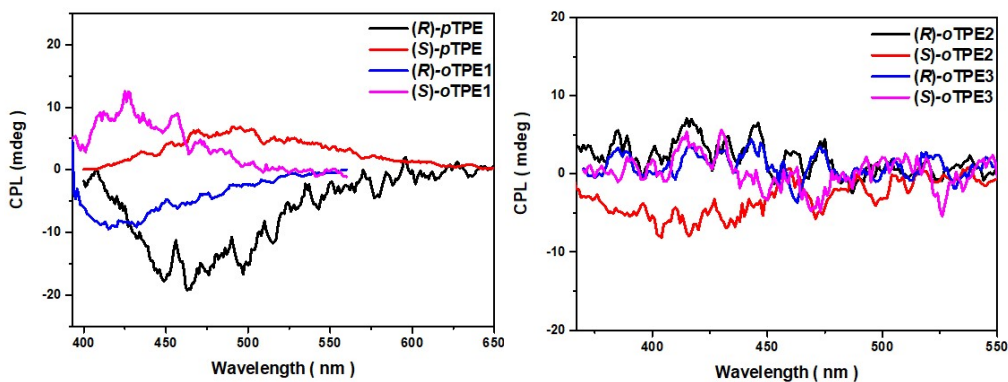

**Figure S10.** CPL spectra of the (*R/S*)-*p*TPE and (*R/S*)-*o*TPE1 to (*R/S*)-*o*TPE3 in the film state.

**Table S3.** Chiroptical properties of the chiral cyclic TPEs in THF solutions.

| Compound                   | $\lambda_{\text{CD}}$ (nm) | $g_{\text{abs}}$ ( $10^{-3}$ ) | $\lambda_{\text{CPL}}$ (nm) | $g_{\text{lum}}$ ( $10^{-3}$ ) |
|----------------------------|----------------------------|--------------------------------|-----------------------------|--------------------------------|
| <i>(R)</i> - <i>p</i> TPE  | 312                        | -1.94                          | 538                         | -1.97                          |
| <i>(S)</i> - <i>p</i> TPE  |                            | 1.56                           |                             | 1.97                           |
| <i>(R)</i> - <i>o</i> TPE1 | 312                        | -3.78                          | 427                         | -1.48                          |
| <i>(S)</i> - <i>o</i> TPE1 |                            | 2.45                           |                             | 1.55                           |
| <i>(R)</i> - <i>o</i> TPE2 | 312                        | 2.50                           | 411                         | 1.06                           |
| <i>(S)</i> - <i>o</i> TPE2 |                            | -3.74                          |                             | -1.06                          |
| <i>(R)</i> - <i>o</i> TPE3 | 312                        | 0.50                           | -                           | -                              |
| <i>(S)</i> - <i>o</i> TPE3 |                            | -1.47                          |                             |                                |

**Table S4.** Chiroptical properties of the chiral cyclic TPEs in aggregate and film states.

| Compound         | 99:1 H <sub>2</sub> O/THF |                     |                 |                     | Flim           |                     |                 |                     |
|------------------|---------------------------|---------------------|-----------------|---------------------|----------------|---------------------|-----------------|---------------------|
|                  | $\lambda_{CD}$            | $g_{abs}$           | $\lambda_{CPL}$ | $g_{lum}$           | $\lambda_{CD}$ | $g_{abs}$           | $\lambda_{CPL}$ | $g_{lum}$           |
|                  | (nm)                      | (10 <sup>-3</sup> ) | (nm)            | (10 <sup>-3</sup> ) | (nm)           | (10 <sup>-3</sup> ) | (nm)            | (10 <sup>-3</sup> ) |
| <b>(R)-pTPE</b>  | 323                       | -0.64               | 498             | -1.05               | 261            | 1.75                | 523             | -1.33               |
| <b>(S)-pTPE</b>  |                           | 0.63                |                 | 1.20                |                | -1.32               |                 | 0.88                |
| <b>(R)-oTPE1</b> | 323                       | -1.18               | 425             | -1.79               | 254            | 1.16                | 427             | -1.75               |
| <b>(S)-oTPE1</b> |                           | 1.12                |                 | 1.78                |                | -1.30               |                 | 1.64                |
| <b>(R)-oTPE2</b> | 346                       | 1.37                | 425             | 1.25                | 229            | 1.37                | 414             | 1.38                |
| <b>(S)-oTPE2</b> |                           | -1.37               |                 | -0.91               |                | -1.84               |                 | -1.38               |
| <b>(R)-oTPE3</b> | 346                       | 0.46                | -               | -                   | 231            | 1.62                | -               | -                   |
| <b>(S)-oTPE3</b> |                           | -0.41               |                 |                     |                | -1.81               |                 |                     |

## 5. Crystal data and structure refinement for the chiral cyclic TPEs

**Table S5.** The dihedral angles of the chiral cyclic TPEs.

| Compound         | A                   | B            | C                   | D                   | Binaphthyl        |
|------------------|---------------------|--------------|---------------------|---------------------|-------------------|
| <b>(R)-pTPE</b>  | <b>56.410(429)°</b> | 48.372(954)° | 40.165(790)°        | <b>51.921(771)°</b> | 113.263(376)<br>° |
| <b>(R)-oTPE1</b> | <b>58.831(458)°</b> | 46.335(458)° | <b>58.256(428)°</b> | 48.483(402)°        | 83.834(201)°      |
| <b>(R)-oTPE2</b> | 50.945(314)°        | 52.375(311)° | <b>56.100(241)°</b> | <b>55.443(304)°</b> | 81.306(91)°       |
| <b>(S)-oTPE3</b> | <b>45.609(800)°</b> | 57.548(657)° | 42.536(874)°        | <b>65.312(646)°</b> | 98.943(268)°      |

**Table S6.** Crystal data and structure refinement for the chiral cyclic TPEs.

| Compound                                    | ( <i>R</i> )- <i>p</i> TPE                                        | ( <i>R</i> )- <i>o</i> TPE1                                       |
|---------------------------------------------|-------------------------------------------------------------------|-------------------------------------------------------------------|
| CCDC                                        | 2182870                                                           | 2182873                                                           |
| Empirical formula                           | C <sub>48</sub> H <sub>34</sub> O <sub>2</sub>                    | C <sub>48</sub> H <sub>34</sub> O <sub>2</sub>                    |
| Formula weight                              | 642.8                                                             | 642.8                                                             |
| Temperature/K                               | 150                                                               | 170                                                               |
| Crystal system                              | monoclinic                                                        | monoclinic                                                        |
| Space group                                 | P 2 <sub>1</sub>                                                  | C 2                                                               |
| a/Å                                         | 14.7146(7)                                                        | 28.682(2)                                                         |
| b/Å                                         | 9.8698(5)                                                         | 11.1603(9)                                                        |
| c/Å                                         | 25.4906(12)                                                       | 27.232(3)                                                         |
| α/°                                         | 90                                                                | 90                                                                |
| β/°                                         | 102.8760(10)                                                      | 112.691(3)                                                        |
| γ/°                                         | 90                                                                | 90                                                                |
| Volume/Å <sup>3</sup>                       | 3608.9(3)                                                         | 8042.2 (12)                                                       |
| Z                                           | 2                                                                 | 8                                                                 |
| ρ <sub>calc</sub> g/cm <sup>3</sup>         | 1.261                                                             | 1.062                                                             |
| μ/mm <sup>-1</sup>                          | 0.147                                                             | 0.063                                                             |
| F(000)                                      | 1436.0                                                            | 2704.0                                                            |
| Crystal size/mm <sup>3</sup>                | 0.13×0.06×0.04                                                    | 0.12 × 0.08 × 0.05                                                |
| Radiation                                   | MoKα (λ = 0.71073)                                                | MoKα (λ = 0.71073)                                                |
| 2θ range for data collection/°              | 3.828 to 50.796                                                   | 3.960 to 52.798                                                   |
| Index ranges                                | -17 ≤ h ≤ 17,<br>-11 ≤ k ≤ 11,<br>-30 ≤ l ≤ 30                    | -35 ≤ h ≤ 35,<br>-13 ≤ k ≤ 13,<br>-29 ≤ l ≤ 34                    |
| Reflections collected                       | 38856                                                             | 34565                                                             |
| Independent reflections                     | 12767 [R <sub>int</sub> = 0.0970,<br>R <sub>sigma</sub> = 0.1207] | 14895 [R <sub>int</sub> = 0.0646,<br>R <sub>sigma</sub> = 0.0955] |
| Data/restraints/parameters                  | 12767/1/928                                                       | 14895/1/901                                                       |
| Goodness-of-fit on F <sup>2</sup>           | 1.044                                                             | 1.018                                                             |
| Final R indexes [I ≥ 2σ (I)]                | R <sub>1</sub> = 0.0829,<br>wR <sub>2</sub> = 0.2030              | R <sub>1</sub> = 0.0704,<br>wR <sub>2</sub> = 0.1628              |
| Final R indexes [all data]                  | R <sub>1</sub> = 0.1388,<br>wR <sub>2</sub> = 0.2438              | R <sub>1</sub> = 0.1227,<br>wR <sub>2</sub> = 0.1987              |
| Largest diff. peak/hole / e Å <sup>-3</sup> | 1.66/-0.59                                                        | 0.35/-0.26                                                        |
| Flack parameter                             | 0.07(9)                                                           | 4.9(8)                                                            |

| Compound                                    | <i>rac-o</i> TPE2                                             | <i>(S)</i> - <i>o</i> TPE3                                     |
|---------------------------------------------|---------------------------------------------------------------|----------------------------------------------------------------|
| CCDC                                        | 2182878                                                       | 2182879                                                        |
| Empirical formula                           | C <sub>48</sub> H <sub>48</sub> O <sub>2</sub>                | C <sub>48</sub> H <sub>48</sub> O <sub>2</sub>                 |
| Formula weight                              | 642.8                                                         | 642.8                                                          |
| Temperature/K                               | 170                                                           | 170                                                            |
| Crystal system                              | triclinic                                                     | triclinic                                                      |
| Space group                                 | P -1                                                          | P1                                                             |
| a/Å                                         | 10.5253(13)                                                   | 10.2979(5)                                                     |
| b/Å                                         | 12.6297(15)                                                   | 17.4037(10)                                                    |
| c/Å                                         | 14.6251(16)                                                   | 17.5627(9)                                                     |
| α/°                                         | 113.373(3)                                                    | 69.825(2)                                                      |
| β/°                                         | 100.425(3)                                                    | 80.955(2)                                                      |
| γ/°                                         | 100.824(4)                                                    | 81.076(2)                                                      |
| Volume/Å <sup>3</sup>                       | 1681.0(3)                                                     | 2900.4(3)                                                      |
| Z                                           | 2                                                             | 3                                                              |
| ρ <sub>calc</sub> g/cm <sup>3</sup>         | 1.270                                                         | 1.104                                                          |
| μ/mm <sup>-1</sup>                          | 0.076                                                         | 0.066                                                          |
| F(000)                                      | 676.0                                                         | 1014.0                                                         |
| Crystal size/mm <sup>3</sup>                | 0.08 × 0.05 × 0.03                                            | 0.19 × 0.06 × 0.05                                             |
| Radiation                                   | MoKα (λ = 0.71073)                                            | MoKα (λ = 0.71073)                                             |
| 2θ range for data collection/°              | 4.108 to 52.834                                               | 4.028 to 52.994                                                |
| Index ranges                                | -13 ≤ h ≤ 13,<br>-15 ≤ k ≤ 15,<br>-16 ≤ l ≤ 18                | -12 ≤ h ≤ 12,<br>-21 ≤ k ≤ 21,<br>-22 ≤ l ≤ 20                 |
| Reflections collected                       | 18951                                                         | 33052                                                          |
| Independent reflections                     | 6798 [R <sub>int</sub> = 0.0959, R <sub>sigma</sub> = 0.1313] | 19422 [R <sub>int</sub> = 0.0361, R <sub>sigma</sub> = 0.0602] |
| Data/restraints/parameters                  | 6798/0/451                                                    | 19422/2331/1340                                                |
| Goodness-of-fit on F <sup>2</sup>           | 1.048                                                         | 1.270                                                          |
| Final R indexes [I ≥ 2σ (I)]                | R <sub>1</sub> = 0.0728,<br>wR <sub>2</sub> = 0.1206          | R <sub>1</sub> = 0.1096,<br>wR <sub>2</sub> = 0.3006           |
| Final R indexes [all data]                  | R <sub>1</sub> = 0.1803,<br>wR <sub>2</sub> = 0.1633          | R <sub>1</sub> = 0.1391,<br>wR <sub>2</sub> = 0.3364           |
| Largest diff. peak/hole / e Å <sup>-3</sup> | 0.23/-0.26                                                    | 1.20/-0.35                                                     |
| Flack parameter                             | -                                                             | -0.8(6)                                                        |

## 6. Chiral HPLC analysis of the chiral cyclic TPEs

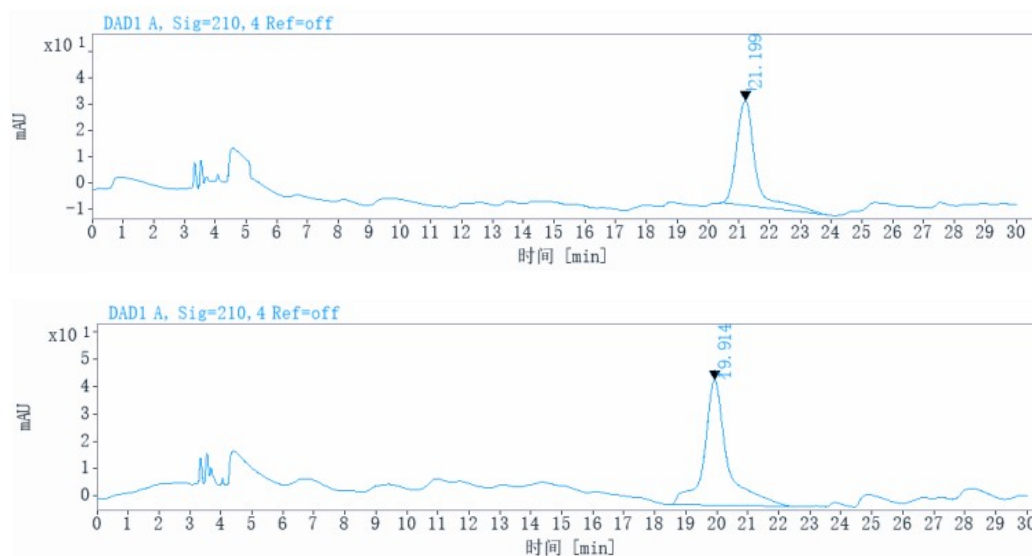

Figure S11. Chiral HPLC spectra of (*R*)-*p*TPE (top) and (*S*)-*p*TPE (bottom)

Table S7. Chiral HPLC data of (*R/S*)-*p*TPE

| Sample                     | Ret. Time (min) | Area (a.u.) | Height (a.u.) | Area (%) | <i>ee</i> value (%) | Column | Mobile Phase                 |
|----------------------------|-----------------|-------------|---------------|----------|---------------------|--------|------------------------------|
| ( <i>R</i> )- <i>p</i> TPE | 21.199          | 1754.525    | 39.944        | 100.000  | 100.0               | AD     | 1% <i>i</i> -PrOH in hexanes |
| ( <i>S</i> )- <i>p</i> TPE | 19.914          | 2420.231    | 45.852        | 100.000  | 100.0               |        |                              |

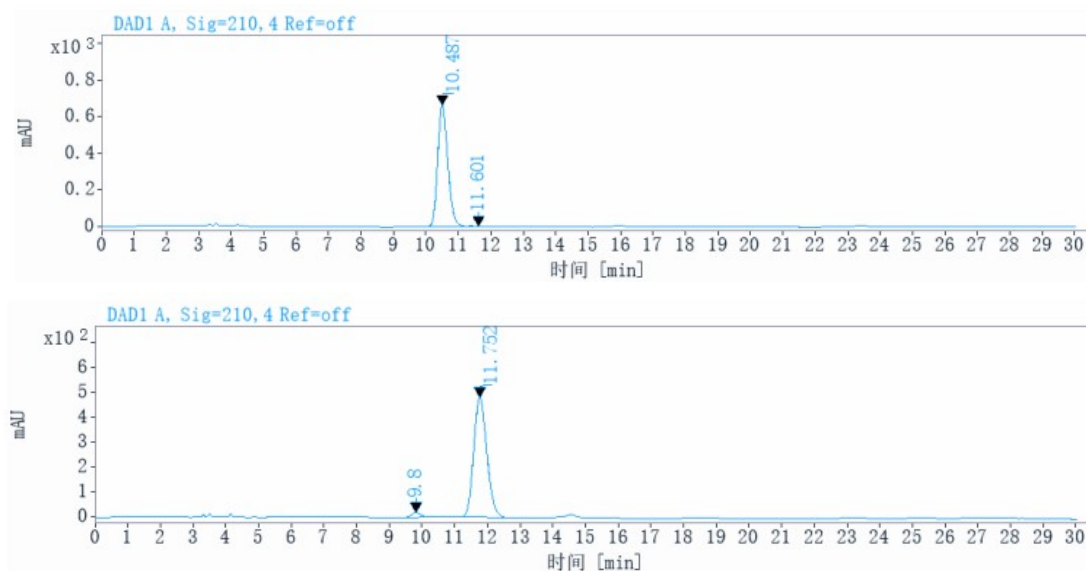

Figure S12. Chiral HPLC spectra of (*R*)-*o*TPE1 (top) and (*S*)-*o*TPE1 (bottom)

Table S8. Chiral HPLC data of (*R/S*)-*o*TPE1

| Sample                      | Ret. Time (min) | Area (a.u.) | Height (a.u.) | Area (%) | <i>ee</i> value (%) | Column | Mobile Phase                 |
|-----------------------------|-----------------|-------------|---------------|----------|---------------------|--------|------------------------------|
| ( <i>R</i> )- <i>o</i> TPE1 | 10.487          | 14444.527   | 664.058       | 99.600   | 99.2                | AD     | 1% <i>i</i> -PrOH in hexanes |

|                         |        |           |         |        |      |
|-------------------------|--------|-----------|---------|--------|------|
|                         | 11.601 | 57.970    | 1.703   | 0.400  |      |
| <b>(S)-<i>o</i>TPE1</b> | 9.800  | 440.384   | 20.920  | 3.131  | 93.7 |
|                         | 11.752 | 13625.050 | 484.066 | 96.870 |      |

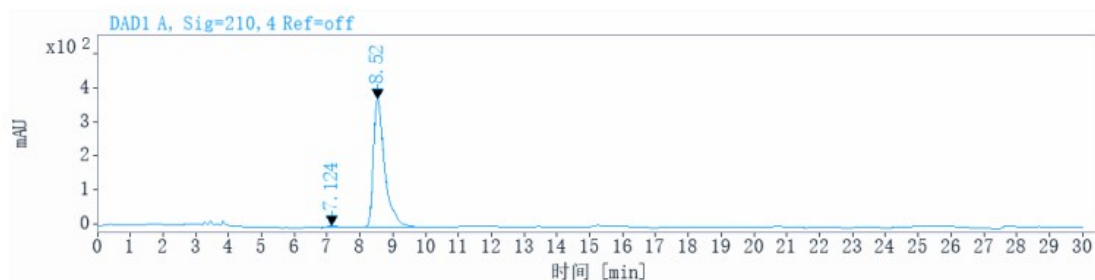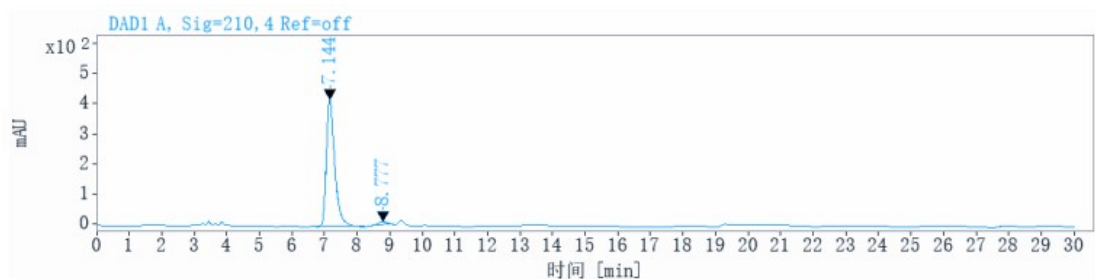

Figure S13. Chiral HPLC spectra of (*R*)-*o*TPE2 (top) and (*S*)-*o*TPE2 (bottom)

Table S9. Chiral HPLC data of (*R/S*)-*o*TPE2

| Sample                         | Ret. Time (min) | Area (a.u.) | Height (a.u.) | Area (%) | <i>ee</i> value (%) | Column | Mobile Phase                 |
|--------------------------------|-----------------|-------------|---------------|----------|---------------------|--------|------------------------------|
| <b>(<i>R</i>)-<i>o</i>TPE2</b> | 7.124           | 115.825     | 5.494         | 1.260    | 97.5                | CD     | 1% <i>i</i> -PrOH in hexanes |
|                                | 8.520           | 9073.723    | 374.946       | 98.740   |                     |        |                              |
| <b>(<i>S</i>)-<i>o</i>TPE2</b> | 7.144           | 7651.361    | 424.036       | 96.784   | 93.6                |        |                              |
|                                | 8.777           | 254.277     | 12.942        | 3.216    |                     |        |                              |

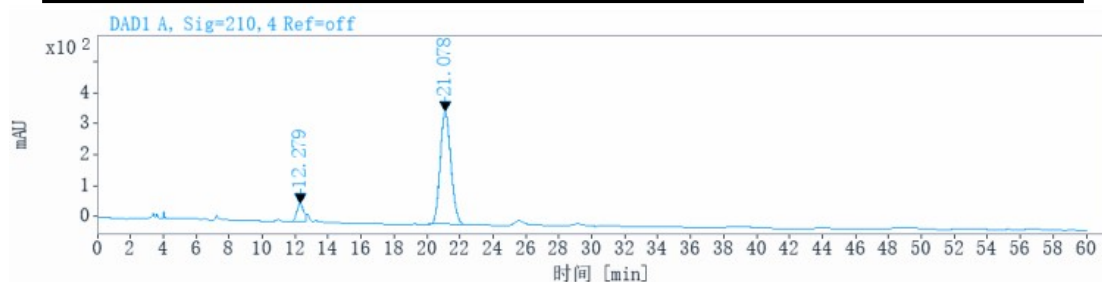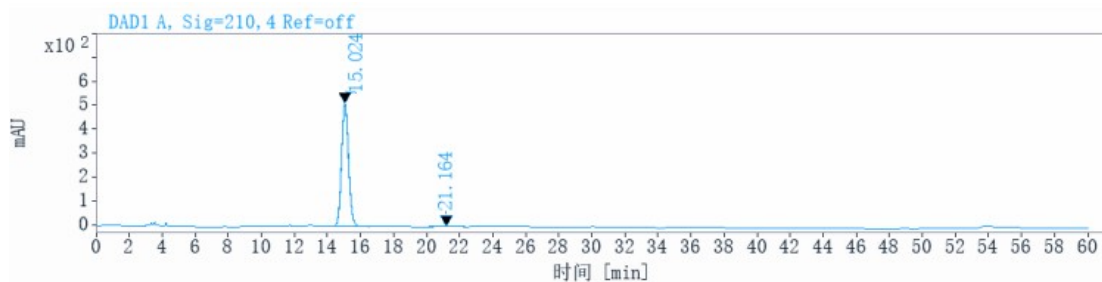

Figure S14. Chiral HPLC spectra of (*R*)-*o*TPE3 (top) and (*S*)-*o*TPE3 (bottom)

Table S10. Chiral HPLC data of (*R/S*)-*o*TPE3

| Sample | Ret. | Area | Height | Area | <i>ee</i> value | Column | Mobile Phase |
|--------|------|------|--------|------|-----------------|--------|--------------|
|--------|------|------|--------|------|-----------------|--------|--------------|

|                  | Time<br>(min) | (a.u.)    | (a.u.)  | (%)    | (%)  |    |                              |
|------------------|---------------|-----------|---------|--------|------|----|------------------------------|
| <b>(R)-oTPE3</b> | 12.279        | 1670.401  | 58.928  | 9.061  | 81.9 | AD | 1% <i>i</i> -PrOH in hexanes |
|                  | 21.078        | 16765.477 | 366.116 | 90.939 |      |    |                              |
| <b>(S)-oTPE3</b> | 15.024        | 15380.312 | 515.613 | 98.233 | 96.5 |    |                              |
|                  | 21.164        | 276.591   | 4.309   | 1.767  |      |    |                              |

## 7. NMR Spectra of the chiral cyclic TPEs

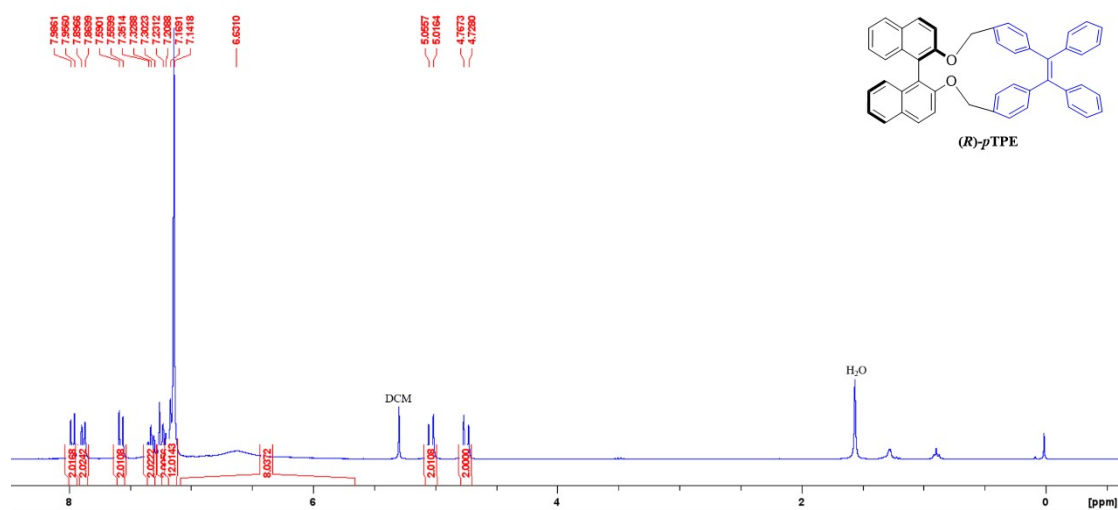

**Figure S15.**  $^1\text{H}$  NMR spectrum of **(R)-pTPE** (300 MHz,  $\text{CDCl}_3$ ).

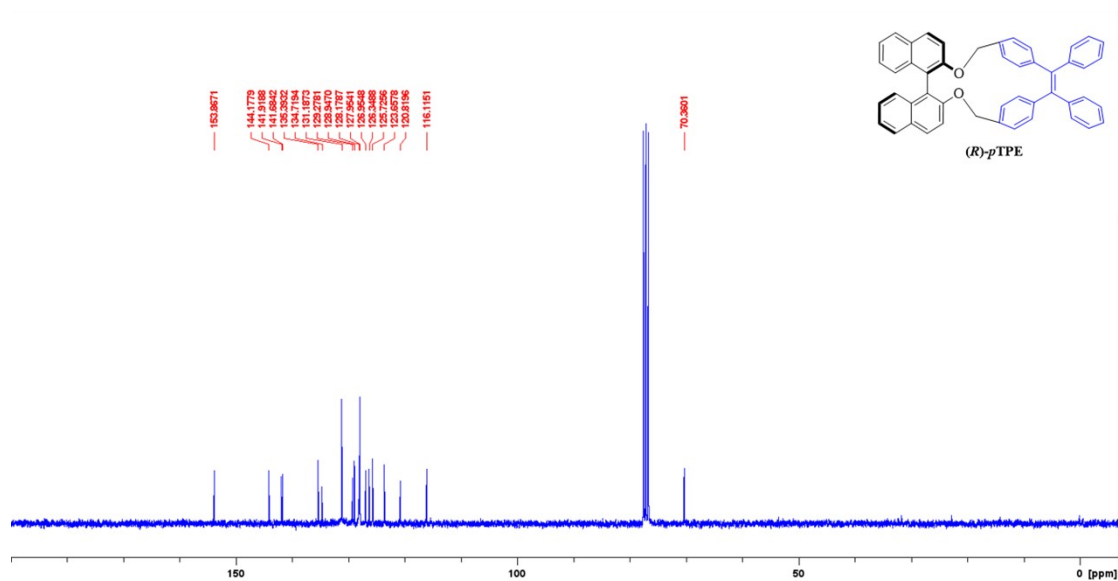

**Figure S16.**  $^{13}\text{C}$  NMR spectrum of **(R)-pTPE** (75 MHz,  $\text{CDCl}_3$ ).



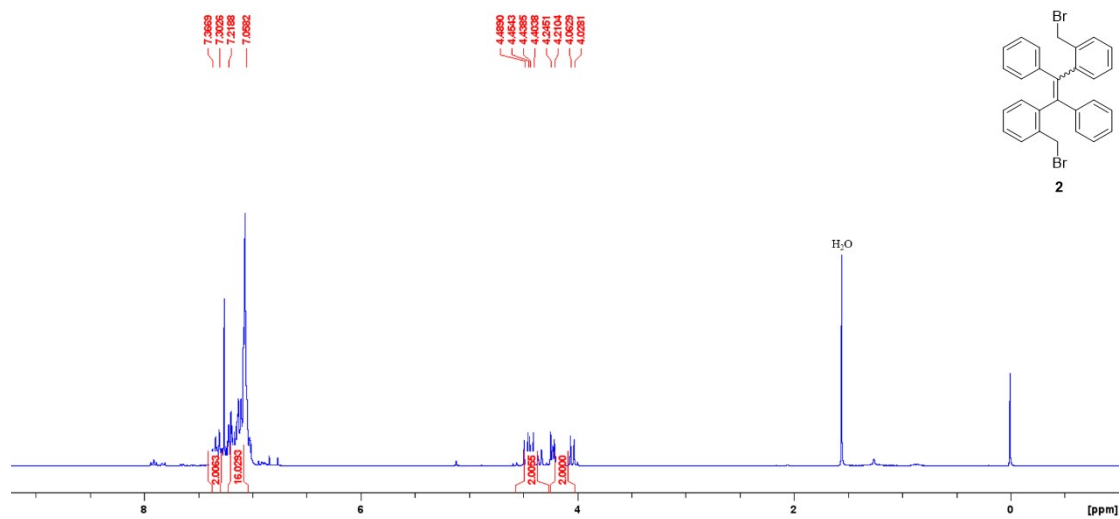

Figure S17. <sup>1</sup>H NMR spectrum of **2** (300 MHz, CDCl<sub>3</sub>).

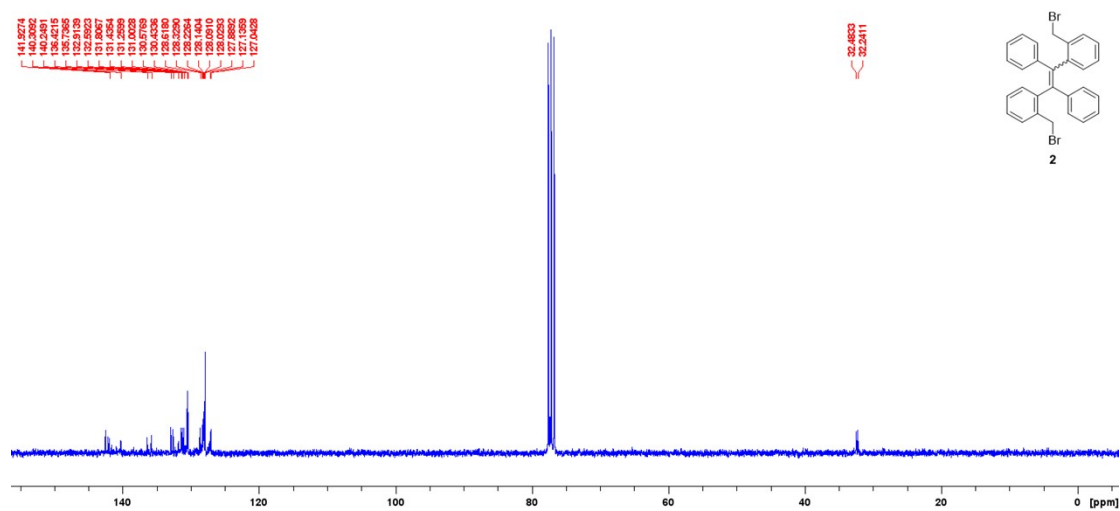

Figure S18. <sup>13</sup>C NMR spectrum of **2** (75 MHz, CDCl<sub>3</sub>).

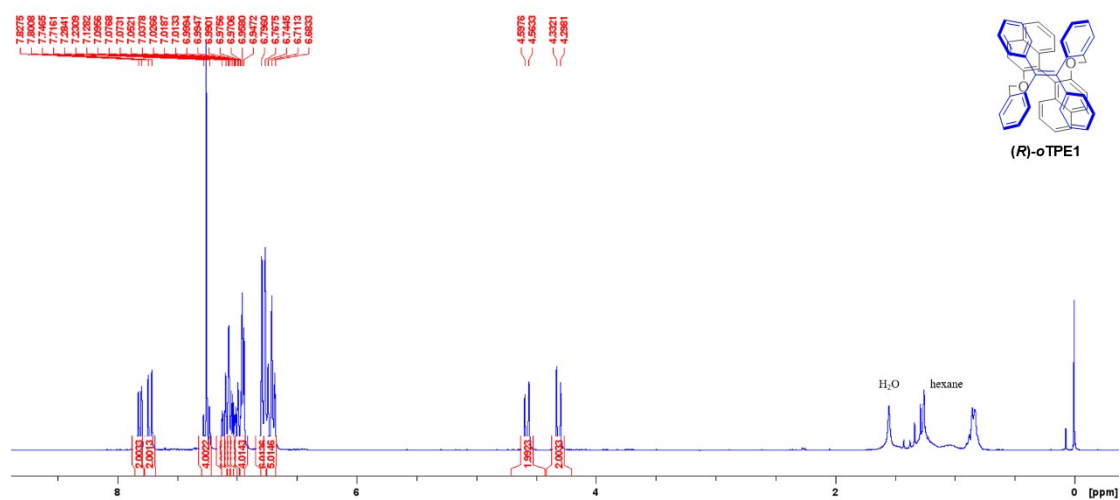

Figure S19. <sup>1</sup>H NMR spectrum of **(R)-oTPE1** (300 MHz, CDCl<sub>3</sub>).

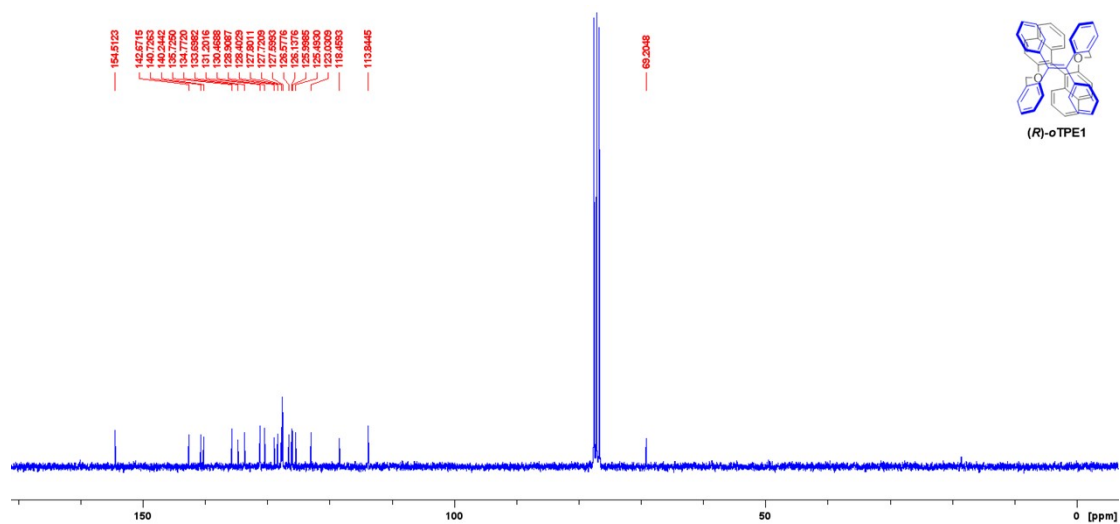

Figure S20. <sup>13</sup>C NMR spectrum of (*R*)-*o*TPE1 (75 MHz, CDCl<sub>3</sub>).

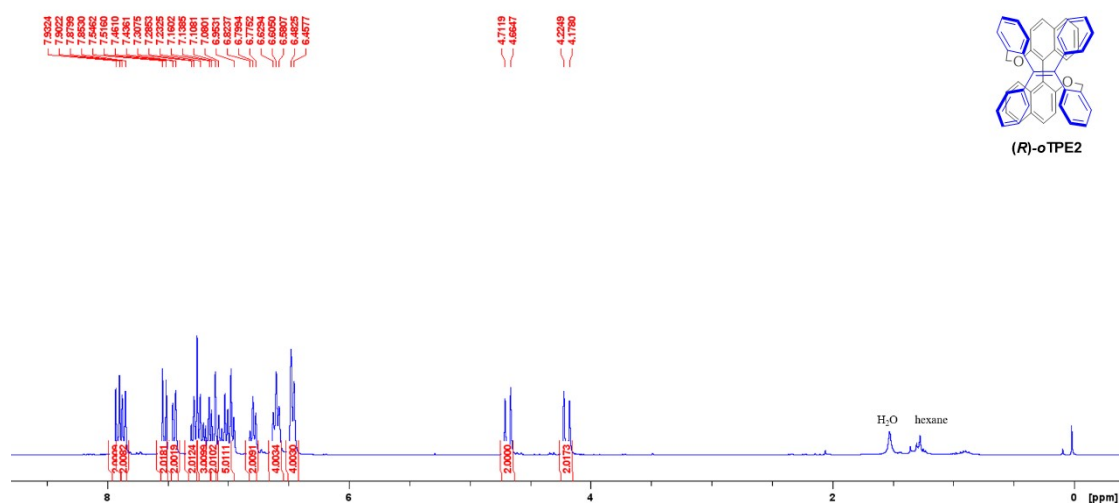

Figure S21. <sup>1</sup>H NMR spectrum of (*R*)-*o*TPE2 (300 MHz, CDCl<sub>3</sub>).

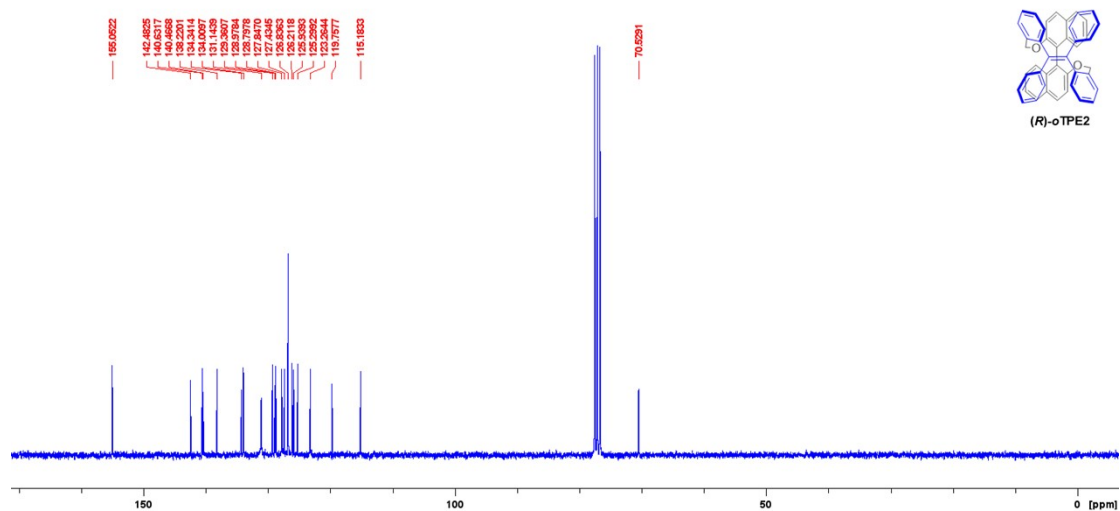

Figure S22. <sup>13</sup>C NMR spectrum of (*R*)-*o*TPE2 (75 MHz, CDCl<sub>3</sub>).

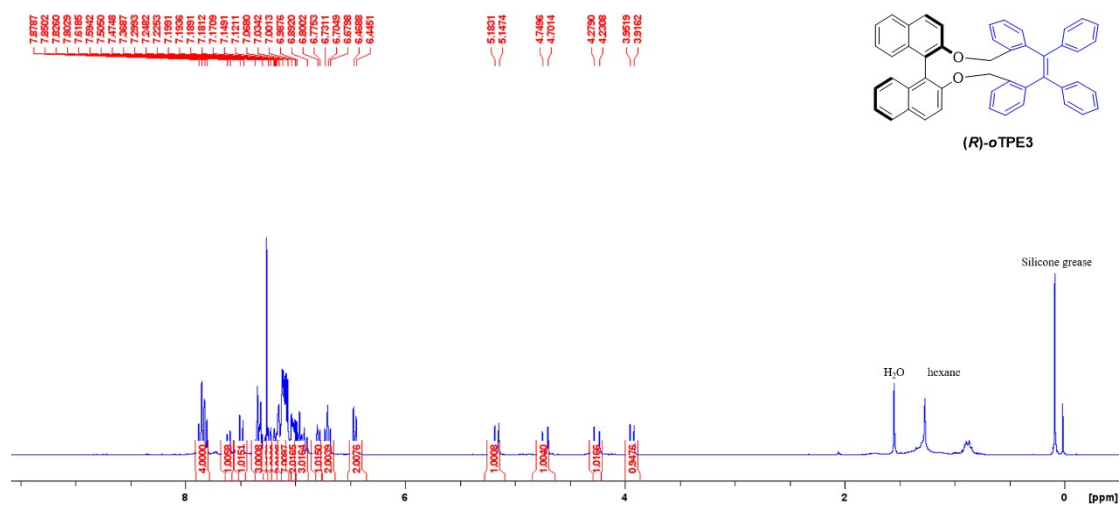

**Figure S23.**  $^1\text{H}$  NMR spectrum of **(R)-oTPE3** (300 MHz,  $\text{CDCl}_3$ ).

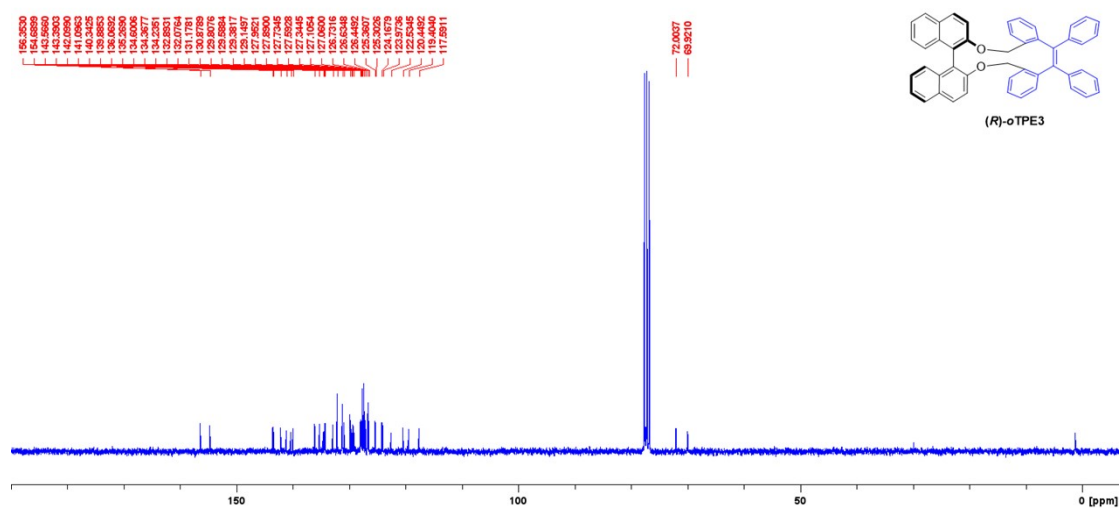

**Figure S24.**  $^{13}\text{C}$  NMR spectrum of **(R)-oTPE3** (75 MHz,  $\text{CDCl}_3$ ).

## 8. HRMS Spectra of the chiral cyclic TPEs

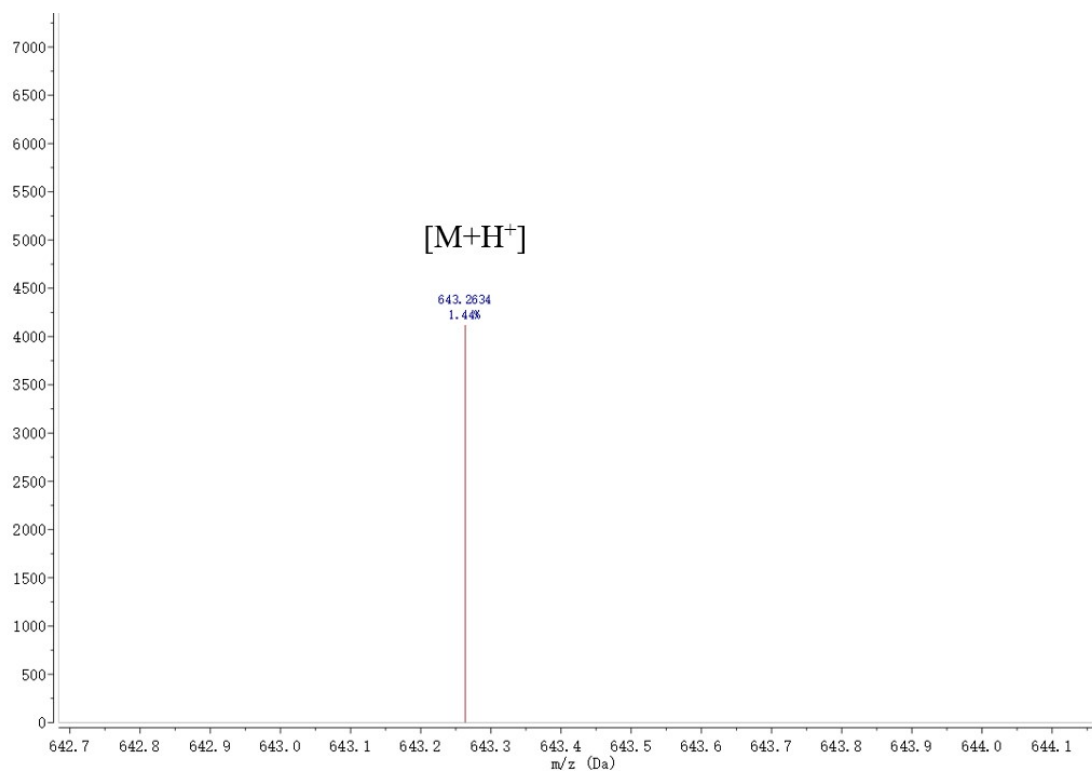

Figure S25. HRMS spectra of (*R*)-*p*TPE.

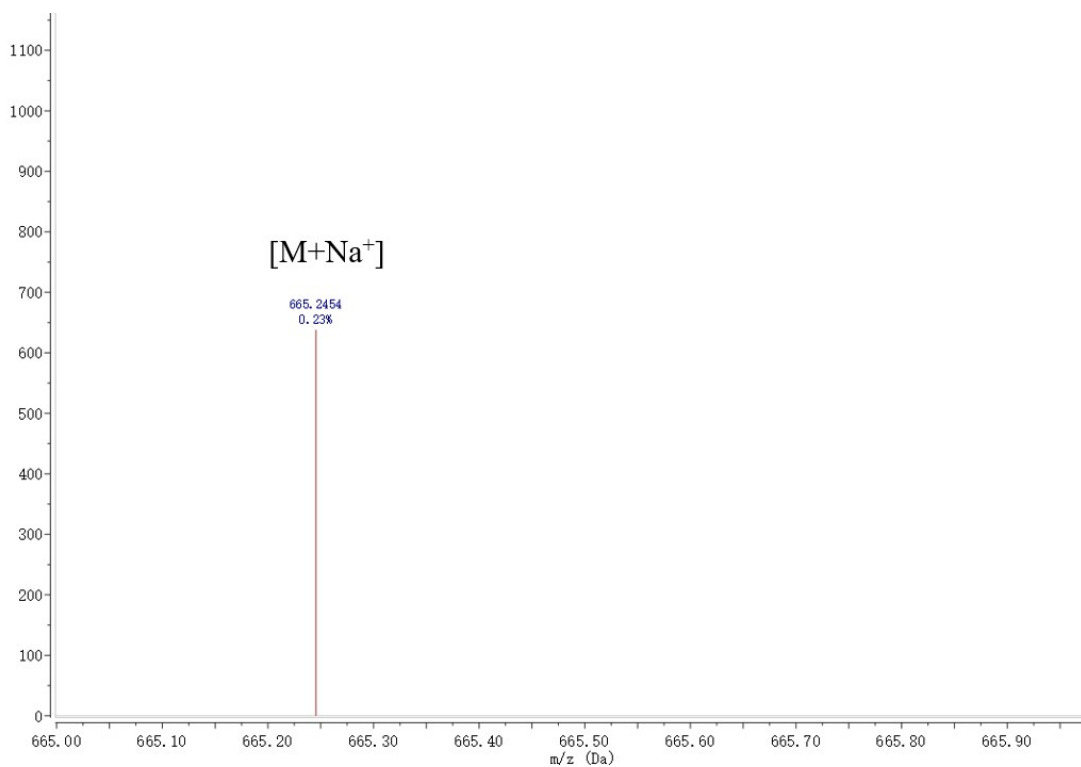

Figure S26. HRMS spectra of (*R*)-*o*TPE1.

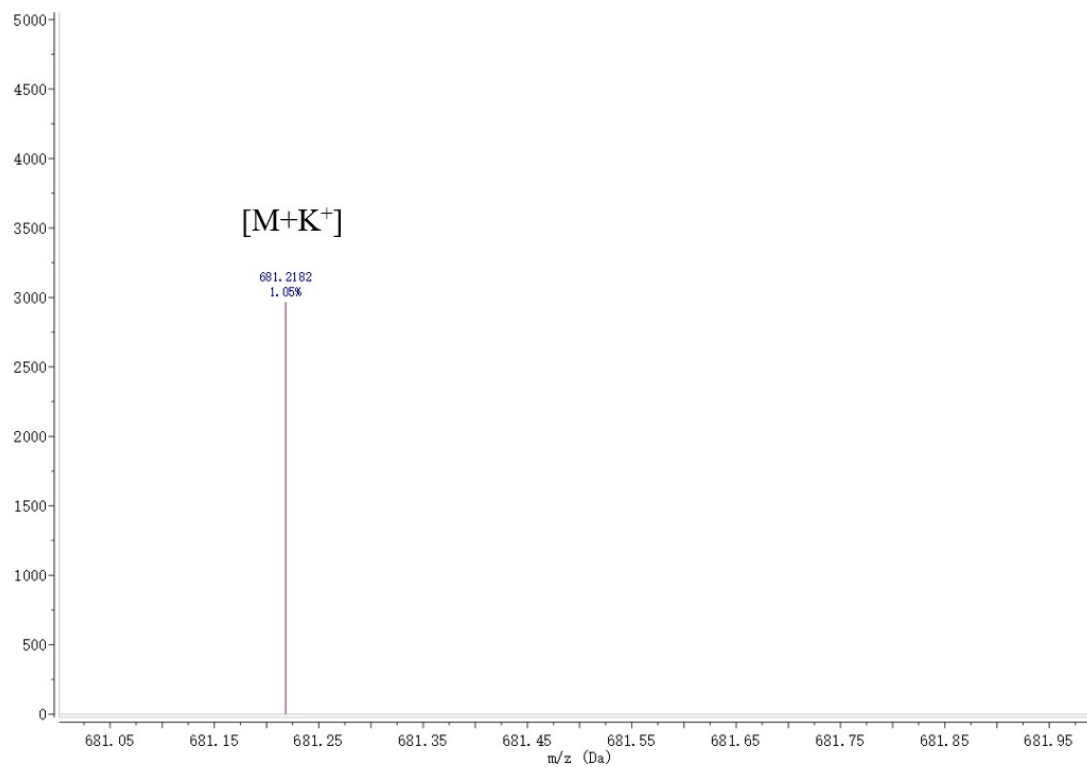

Figure S27. HRMS spectra of (R)-oTPE2.

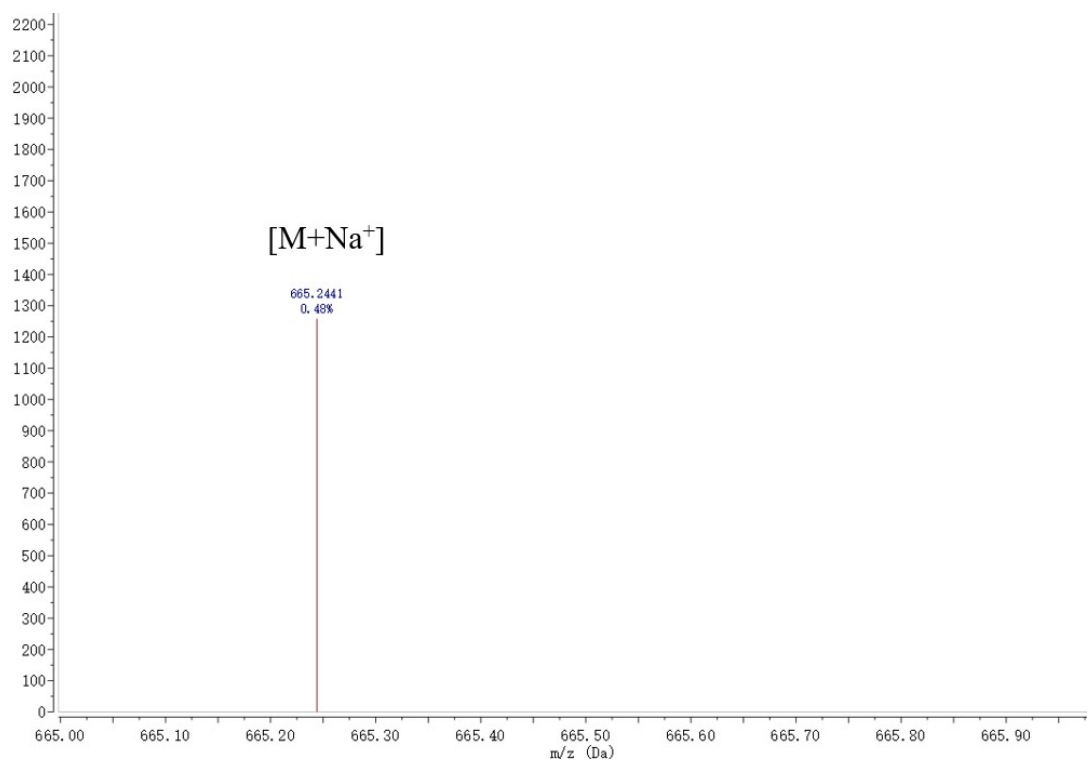

Figure S28. HRMS spectra of (R)-oTPE3.

## 9. Theoretical calculations of chiral cyclic TPEs

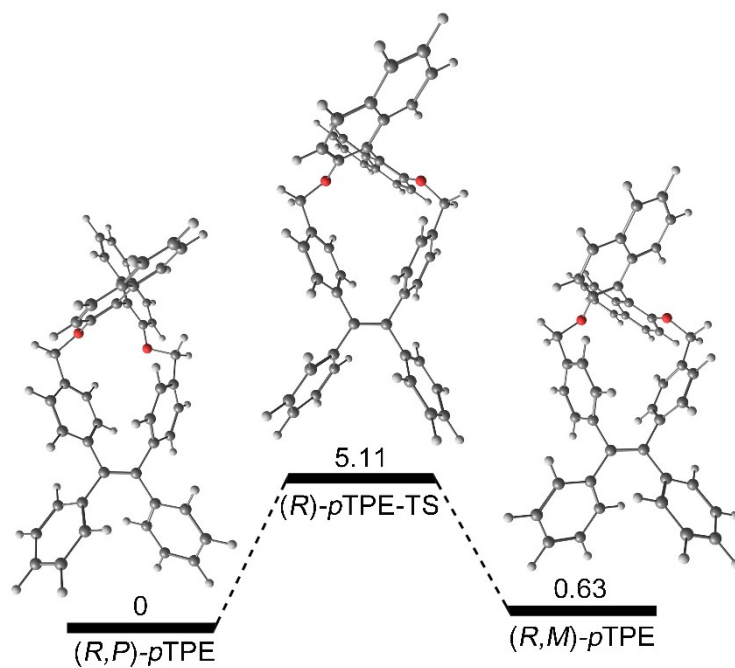

**Figure S29.** Optimized structures and energy diagrams for the interconversion between *(M)* and *(P)* configurations of *(R)*-*p*TPE. The relative free energies are given in kcal mol<sup>-1</sup>.

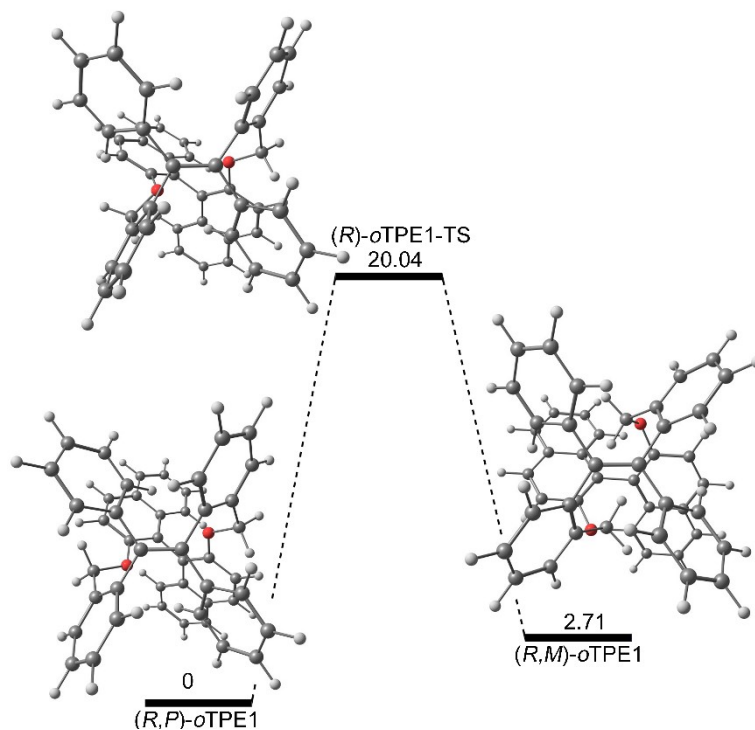

**Figure S30.** Optimized structures and energy diagrams for the interconversion between *(M)* and *(P)* configurations of *(R)*-*o*TPE1. The relative free energies are given in kcal mol<sup>-1</sup>.

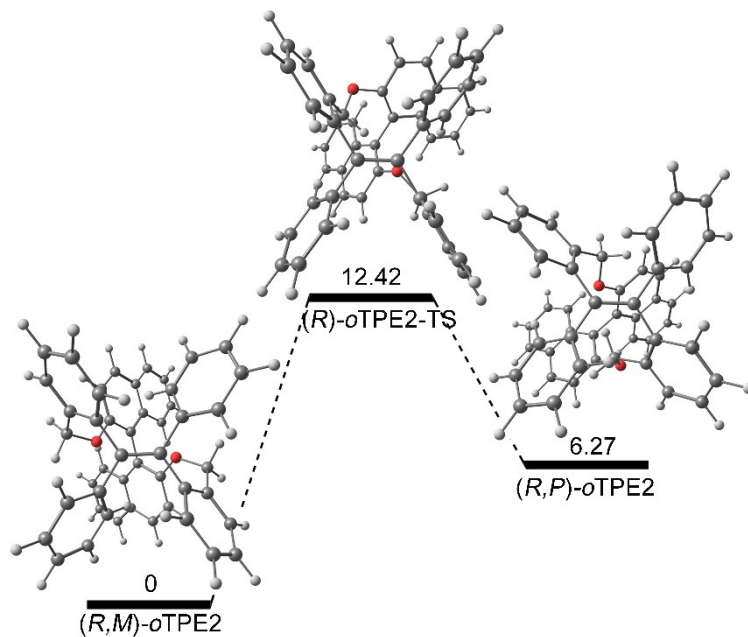

**Figure S31.** Optimized structures and energy diagrams for the interconversion between (*M*) and (*P*) configurations of (*R*)-*o*TPE2. The relative free energies are given in kcal mol<sup>-1</sup>.

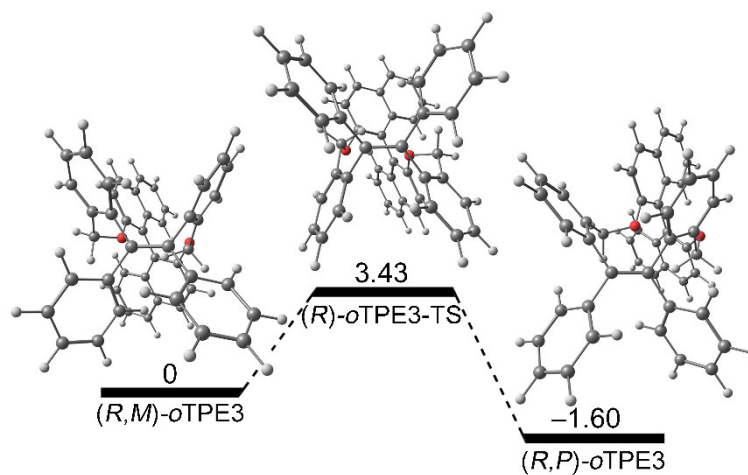

**Figure S32.** Optimized structures and energy diagrams for the interconversion between (*M*) and (*P*) configurations of (*R*)-*o*TPE3. The relative free energies are given in kcal mol<sup>-1</sup>.
